# Supplementary material for: Defect Properties of Li2NiGe3O8
Source: MDPI journal article supplement (doi:10.3390/cleantechnol4030038), 2022-07-01
Supplement: s1 [file s1]

# Defect Properties of $\text{Li}_2\text{NiGe}_3\text{O}_8$

Navaratnarajah Kuganathan <sup>1,\*</sup>, Raveena Sukumar <sup>2</sup> and Poobalasuntharam Iyngaran <sup>2</sup>

<sup>1</sup> Department of Materials, Faculty of Engineering, Imperial College London, London SW7 2AZ, UK

<sup>2</sup> Department of Chemistry, University of Jaffna, Sir. Pon Ramanathan Road, Thirunelvely, Jaffna 40000, Sri Lanka

\* Correspondence: n.kuganathan@imperial.ac.uk

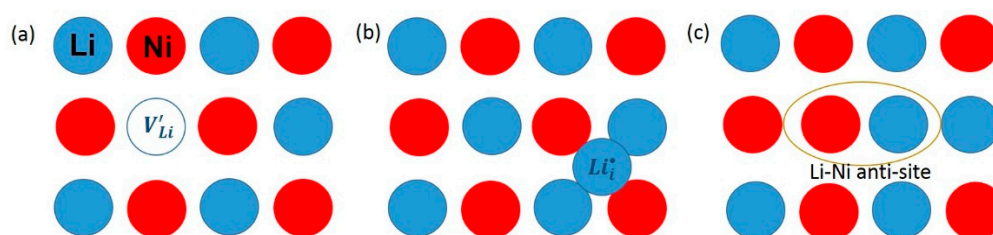

**Figure S1.** Schematic diagrams showing vacancy, interstitial, and anti-site defects.

**Table S1.** Two body Buckingham potentials used for dopant oxides in  $\text{Li}_2\text{NiGe}_3\text{O}_8$ .

| Interaction                      | $A$ (eV)    | $\rho$ (Å) | $C$ (eV·Å <sup>6</sup> ) | $\gamma$ (e) | $K$ (eV·Å <sup>-2</sup> ) |
|----------------------------------|-------------|------------|--------------------------|--------------|---------------------------|
| $\text{Na}^+ - \text{O}^{2-}$    | 1497.830598 | 0.287483   | 0.00                     | 1.00         | 99999                     |
| $\text{K}^+ - \text{O}^{2-}$     | 1000.30     | 0.36198    | 10.56900                 | 1.00         | 99999                     |
| $\text{Rb}^+ - \text{O}^{2-}$    | 1010.80     | 0.3793     | 0.000                    | 1.00         | 99999                     |
| $\text{Fe}^{2+} - \text{O}^{2-}$ | 1207.6      | 0.3084     | 0.000                    | 2.000        | 99999                     |
| $\text{Co}^{2+} - \text{O}^{2-}$ | 696.3       | 0.3362     | 0.000                    | 2.000        | 10.74                     |
| $\text{Zn}^{2+} - \text{O}^{2-}$ | 499.6       | 0.3595     | 0.000                    | 2.050        | 10.28                     |
| $\text{Mn}^{2+} - \text{O}^{2-}$ | 715.80      | 0.3464     | 0.000                    | 3.000        | 81.20                     |
| $\text{Cu}^{2+} - \text{O}^{2-}$ | 3799.3      | 0.24273    | 0.000                    | 2.000        | 99999                     |
| $\text{Ca}^{2+} - \text{O}^{2-}$ | 1090.40     | 0.3372     | 0.000                    | 1.260        | 34.00                     |
| $\text{Sr}^{2+} - \text{O}^{2-}$ | 776.84      | 0.35867    | 0.000                    | 1.526        | 11.406                    |
| $\text{Ba}^{2+} - \text{O}^{2-}$ | 931.79      | 0.3949     | 0.000                    | 1.460        | 14.78                     |
| $\text{Al}^{3+} - \text{O}^{2-}$ | 1114.9      | 0.3118     | 0.000                    | 1.000        | 99999                     |
| $\text{Ga}^{3+} - \text{O}^{2-}$ | 2901.12     | 0.2742     | 0.000                    | 1.000        | 99999                     |
| $\text{Sc}^{3+} - \text{O}^{2-}$ | 1575.85     | 0.3211     | 0.000                    | 3.000        | 99999                     |
| $\text{In}^{3+} - \text{O}^{2-}$ | 1495.65     | 0.3327     | 4.33                     | 3.000        | 99999                     |
| $\text{Y}^{3+} - \text{O}^{2-}$  | 1345.10     | 0.3491     | 0.00                     | 3.000        | 99999                     |
| $\text{Gd}^{3+} - \text{O}^{2-}$ | 1885.75     | 0.3399     | 20.34                    | 3.000        | 99999                     |
| $\text{La}^{3+} - \text{O}^{2-}$ | 1545.21     | 0.3590     | 0.00                     | −0.250       | 145.0                     |
| $\text{Si}^{4+} - \text{O}^{2-}$ | 1283.91     | 0.320520   | 10.66                    | 4.000        | 99999                     |
| $\text{Sn}^{4+} - \text{O}^{2-}$ | 1414.32     | 0.3479     | 13.66                    | 4.000        | 99999                     |
| $\text{Ti}^{4+} - \text{O}^{2-}$ | 5111.7      | 0.2625     | 0.00                     | −0.10        | 314.0                     |
| $\text{Zr}^{4+} - \text{O}^{2-}$ | 985.869     | 0.3760     | 0.00                     | 1.35         | 169.617                   |
| $\text{Ce}^{4+} - \text{O}^{2-}$ | 1986.83     | 0.3511     | 20.40                    | 7.70         | 291.75                    |
